# Supplementary material for: A Brief History of Cleveland State University
Source: Royal Society of Chemistry journal article supplement (doi:10.1039/d0an00998a), 2010-01-01
Supplement: d0an00998a5.pdf [file d0an00998a5.pdf]

**Supplementary information**

# Picoliter Enzyme Reactor on Nanofluidic Device Exceeding Bulk Reaction Rate

Koki Yamamoto<sup>1</sup>, Kyojiro Morikawa<sup>2,\*</sup>, Hiroyuki Imanaka<sup>3</sup>, Koreyoshi Imamura<sup>3</sup>, and  
Takehiko Kitamori<sup>1,2,\*</sup>

*1 Department of Bioengineering, School of Engineering, The University of Tokyo, 7-3-1 Hongo, Bunkyo, Tokyo 113-8656, Japan*

*2 Department of Applied Chemistry, School of Engineering, The University of Tokyo, 7-3-1 Hongo, Bunkyo, Tokyo 113-8656, Japan*

*3 Division of Chemistry and Biochemistry, Graduate School of Natural Science and Technology, Okayama University, 3-1-1 Tsushima-Naka, Kita-Ku, Okayama 700-8530, Japan.*

Corresponding authors

\* To whom correspondence should be addressed:

Kyojiro Morikawa: morikawa@icl.t.u-tokyo.ac.jp

Takehiko Kitamori: kitamori@icl.t.u-tokyo.ac.jp

Figure S1.

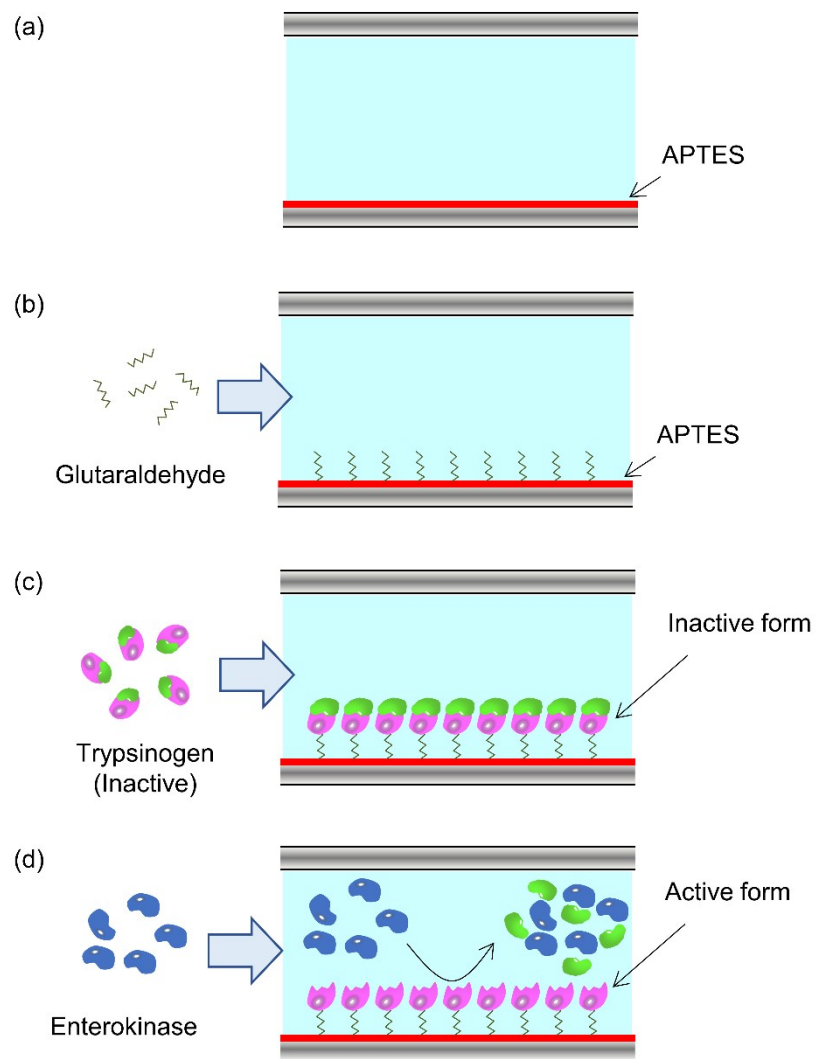

Figure S1. Summary of trypsinogen immobilization process.

Figure S2.

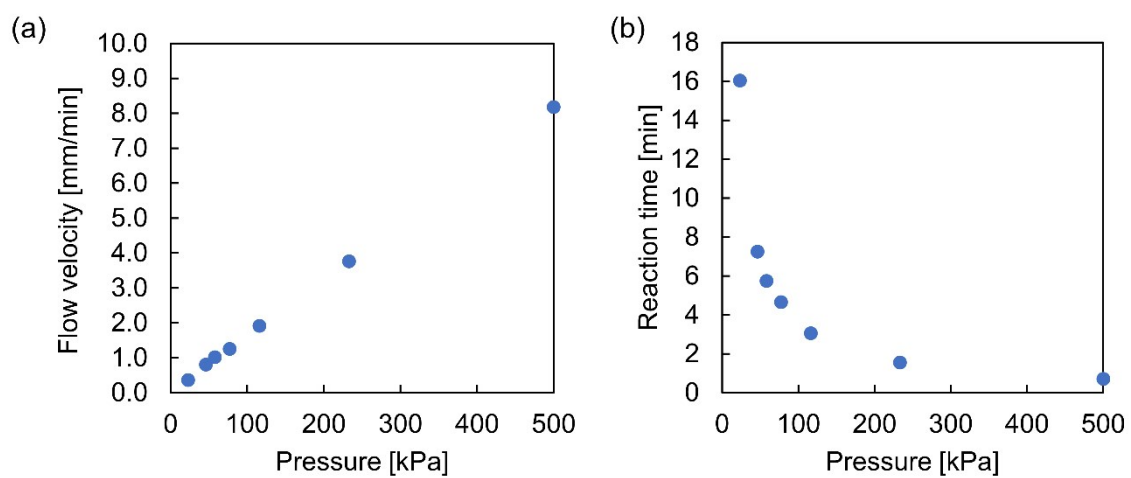

Figure S2. (a) measured flow velocity with different applied pressure. (b) reaction time with different applied pressure determined by (a).

Figure S3.

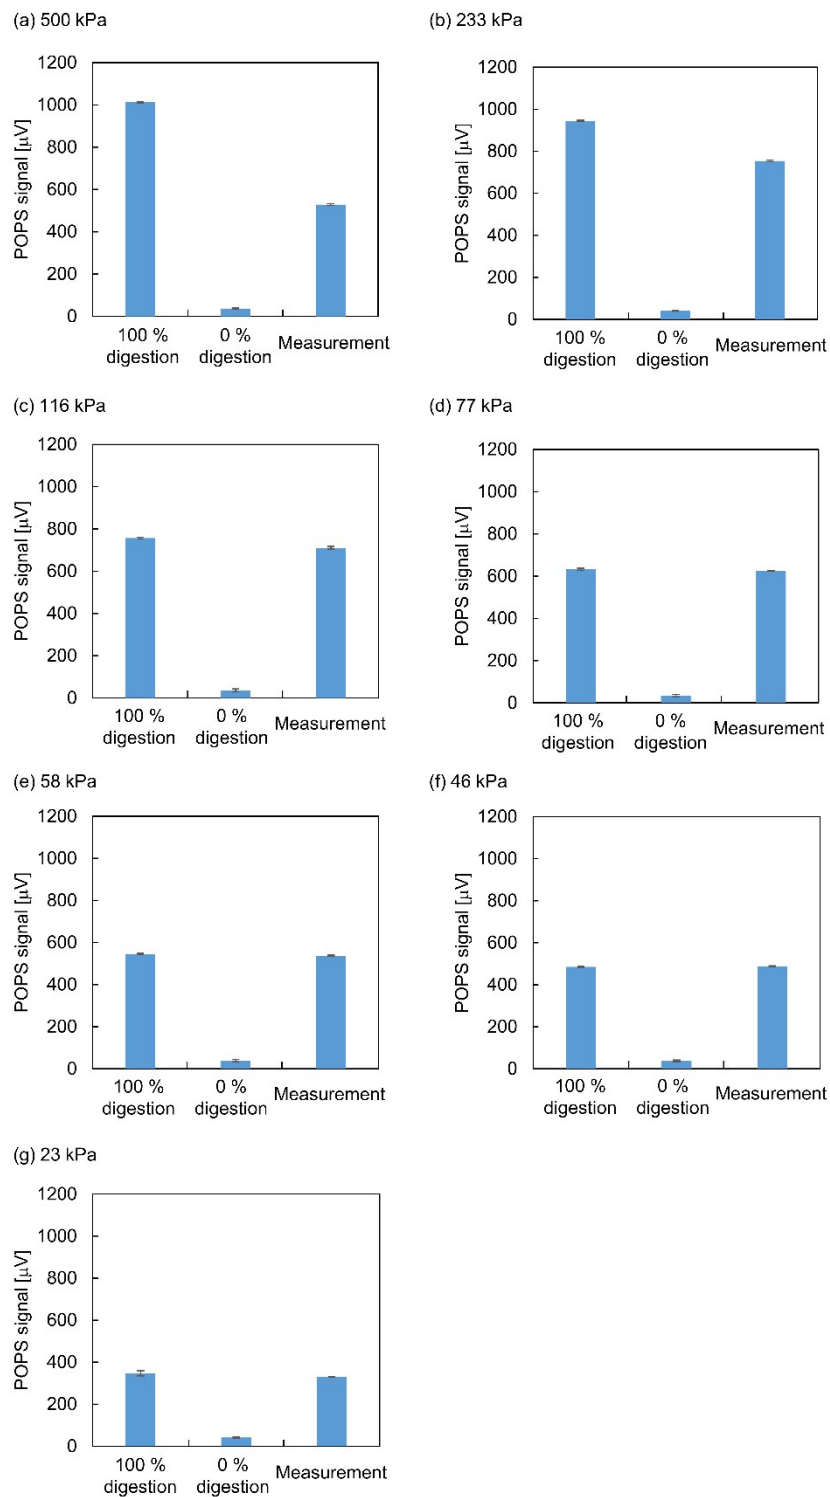

Figure S3. Calibration of POPS signals to tryptic hydrolysis rate in different applied pressure (a)-(g) from the signals of 100% digestion and 0% digestion.
